# Supplementary material for: The Impact of the COVID-19 Pandemic on the Number of Cancer Patients and Radiotherapy Procedures in the Warmia and Masuria Voivodeship
Source: MDPI journal article supplement (doi:10.3390/curroncol30010077), 2023-01-11

**Table S1.** Distribution of RT procedures and patients due to cancer localization.

| Cancer localization               | RT procedures $p<0.001$ |      |        |      | Patients $p<0.001$ |      |        |      |
|-----------------------------------|-------------------------|------|--------|------|--------------------|------|--------|------|
|                                   | OLSZTYN                 |      | ELBLĄG |      | OLSZTYN            |      | ELBLĄG |      |
|                                   | n                       | (%)  | n      | (%)  | n                  | (%)  | n      | (%)  |
| Head and neck                     | 263                     | 8.4  | 187    | 7.4  | 246                | 8.6  | 181    | 8.7  |
| Upper digestive system            | 95                      | 3.0  | 82     | 3.2  | 83                 | 2.9  | 72     | 3.4  |
| Lower digestive system            | 291                     | 9.2  | 158    | 6.2  | 272                | 9.6  | 137    | 6.6  |
| Respiratory system                | 798                     | 25.3 | 783    | 30.9 | 684                | 24.0 | 578    | 27.7 |
| Breast                            | 731                     | 23.2 | 501    | 19.8 | 670                | 23.5 | 426    | 20.4 |
| Gynecological                     | 215                     | 6.8  | 127    | 5.0  | 203                | 7.1  | 121    | 5.8  |
| Prostate                          | 512                     | 16.3 | 453    | 17.9 | 478                | 16.8 | 398    | 19.0 |
| Urinary system (without prostate) | 129                     | 4.1  | 135    | 5.3  | 103                | 3.6  | 87     | 4.2  |
| CNS                               | 74                      | 2.4  | 59     | 2.3  | 73                 | 2.6  | 59     | 2.8  |
| FPI                               | 40                      | 1.3  | 46     | 1.8  | 36                 | 1.3  | 31     | 1.5  |

**Table S2.** The number of radiotherapy procedures and patients treated with radiation therapy in the Warmia-Masuria voivodeship due to different cancer localization.

|                                   | RT procedures   |     |                 |     |        |      |      | Patients        |     |                 |     |        |      |      |
|-----------------------------------|-----------------|-----|-----------------|-----|--------|------|------|-----------------|-----|-----------------|-----|--------|------|------|
|                                   | Before pandemic |     | During pandemic |     | change | (%)  | p    | Before pandemic |     | During pandemic |     | change | (%)  | p    |
|                                   | n               | (%) | n               | (%) |        |      |      | n               | (%) | n               | (%) |        |      |      |
| Head and neck                     |                 |     |                 |     |        |      |      |                 |     |                 |     |        |      |      |
| palliative RT                     | 102             | 42  | 68              | 33  | -34    | (33) | 0.04 | 95              | 42  | 59              | 30  | -36    | (38) | 0.01 |
| radical RT                        | 140             | 58  | 140             | 67  | 0      | (0)  |      | 133             | 58  | 140             | 70  | 7      | (5)  |      |
| total                             | 242             |     | 208             |     | -34    | (14) |      | 228             |     | 199             |     | -29    | (13) |      |
| Upper digestive system            |                 |     |                 |     |        |      |      |                 |     |                 |     |        |      |      |
| palliative RT                     | 34              | 43  | 49              | 62  | 15     | (44) | 0.36 | 28              | 39  | 40              | 48  | 12     | (43) | 0.31 |
| radical RT                        | 45              | 57  | 49              | 62  | 4      | (9)  |      | 43              | 61  | 44              | 52  | 1      | (2)  |      |
| total                             | 79              |     | 98              |     | 19     | (24) |      | 71              |     | 84              |     | 13     | (18) |      |
| Lower digestive system            |                 |     |                 |     |        |      |      |                 |     |                 |     |        |      |      |
| palliative RT                     | 91              | 38  | 71              | 34  | -20    | (22) | 0.43 | 77              | 35  | 60              | 31  | -17    | (22) | 0.40 |
| radical RT                        | 150             | 62  | 137             | 66  | -13    | (9)  |      | 141             | 65  | 131             | 69  | -10    | (7)  |      |
| total                             | 241             |     | 208             |     | -33    | (14) |      | 218             |     | 191             |     | -27    | (12) |      |
| Respiratory system                |                 |     |                 |     |        |      |      |                 |     |                 |     |        |      |      |
| palliative RT                     | 438             | 52  | 395             | 54  | -43    | (10) | 0.50 | 368             | 55  | 324             | 55  | -44    | (12) | 0.86 |
| radical RT                        | 406             | 48  | 342             | 46  | -64    | (16) |      | 306             | 45  | 264             | 45  | -42    | (14) |      |
| total                             | 844             |     | 737             |     | -107   | (13) |      | 674             |     | 588             |     | -86    | (13) |      |
| Breast                            |                 |     |                 |     |        |      |      |                 |     |                 |     |        |      |      |
| palliative RT                     | 223             | 34  | 164             | 28  | -59    | (26) | 0.02 | 175             | 31  | 133             | 25  | -42    | (24) | 0.06 |
| radical RT                        | 428             | 66  | 417             | 72  | -11    | (3)  |      | 397             | 69  | 391             | 75  | -6     | (2)  |      |
| total                             | 651             |     | 581             |     | -70    | (11) |      | 572             |     | 524             |     | -48    | (8)  |      |
| Gynecological                     |                 |     |                 |     |        |      |      |                 |     |                 |     |        |      |      |
| palliative RT                     | 84              | 46  | 81              | 51  | -3     | (4)  | 0.41 | 76              | 44  | 75              | 49  | -1     | (1)  | 0.41 |
| radical RT                        | 98              | 54  | 79              | 49  | -19    | (19) |      | 95              | 56  | 78              | 51  | -17    | (18) |      |
| total                             | 182             |     | 160             |     | -22    | (12) |      | 171             |     | 153             |     | -18    | (11) |      |
| Prostate                          |                 |     |                 |     |        |      |      |                 |     |                 |     |        |      |      |
| palliative RT                     | 157             | 32  | 148             | 32  | -9     | (6)  | 0.99 | 140             | 30  | 116             | 28  | -24    | (17) | 0.41 |
| radical RT                        | 340             | 68  | 320             | 68  | -20    | (6)  |      | 320             | 70  | 300             | 72  | -20    | (6)  |      |
| total                             | 497             |     | 468             |     | -29    | (6)  |      | 460             |     | 416             |     | -44    | (10) |      |
| Urinary system (without prostate) |                 |     |                 |     |        |      |      |                 |     |                 |     |        |      |      |
| palliative RT                     | 89              | 73  | 103             | 73  | 14     | (16) | 0.94 | 70              | 74  | 74              | 78  | 4      | (6)  | 0.50 |
| radical RT                        | 33              | 27  | 39              | 27  | 6      | (18) |      | 25              | 26  | 21              | 22  | -4     | (16) |      |
| total                             | 122             |     | 142             |     | 20     | (16) |      | 95              |     | 95              |     | 0      | (0)  |      |
| CNS                               |                 |     |                 |     |        |      |      |                 |     |                 |     |        |      |      |
| palliative RT                     | 18              | 27  | 20              | 30  | 2      | (11) | 0.66 | 18              | 27  | 19              | 29  | 1      | (6)  | 0.76 |
| radical RT                        | 49              | 73  | 46              | 70  | -3     | (6)  |      | 49              | 73  | 46              | 71  | -3     | (6)  |      |
| total                             | 67              |     | 66              |     | -1     | (1)  |      | 67              |     | 65              |     | -2     | (3)  |      |
| FPI                               |                 |     |                 |     |        |      |      |                 |     |                 |     |        |      |      |
| palliative RT                     | 40              | 78  | 23              | 66  | -17    | (43) | 0.19 | 31              | 82  | 21              | 72  | -10    | (32) | 0.37 |
| radical RT                        | 11              | 22  | 12              | 34  | 1      | (9)  |      | 7               | 18  | 8               | 28  | 1      | (14) |      |
| total                             | 51              |     | 35              |     | -16    | (31) |      | 38              |     | 29              |     | -9     | (24) |      |

**Table S3.** The number of radiotherapy procedures and patients treated with radiation therapy in Olsztyn due to different cancer localization.

|                                   | RT procedures   |     |                 |     |        |       |      | Patients        |     |                 |     |        |       |      |
|-----------------------------------|-----------------|-----|-----------------|-----|--------|-------|------|-----------------|-----|-----------------|-----|--------|-------|------|
|                                   | Before pandemic |     | During pandemic |     | change | (%)   | p    | Before pandemic |     | During pandemic |     | change | (%)   | p    |
|                                   | n               | (%) | n               | (%) |        |       |      | n               | (%) | n               | (%) |        |       |      |
| Head and neck                     |                 |     |                 |     |        |       |      |                 |     |                 |     |        |       |      |
| palliative RT                     | 48              | 34  | 37              | 30  | -11    | (23)  | 0.47 | 41              | 31  | 29              | 25  | -12    | (29)  | 0.29 |
| radical RT                        | 92              | 66  | 86              | 70  | -6     | (7)   |      | 90              | 69  | 86              | 75  | -4     | (4)   |      |
| total                             | 140             |     | 123             |     | -17    | (12)  |      | 131             |     | 115             |     | -16    | (12)  |      |
| Upper digestive system            |                 |     |                 |     |        |       |      |                 |     |                 |     |        |       |      |
| palliative RT                     | 28              | 54  | 27              | 63  | -1     | (4)   | 0.38 | 22              | 48  | 21              | 57  | -1     | (5)   | 0.42 |
| radical RT                        | 24              | 46  | 16              | 37  | -8     | (33)  |      | 24              | 52  | 16              | 43  | -8     | (33)  |      |
| total                             | 52              |     | 43              |     | -9     | (17)  |      | 46              |     | 37              |     | -9     | (20)  |      |
| Lower digestive system            |                 |     |                 |     |        |       |      |                 |     |                 |     |        |       |      |
| palliative RT                     | 45              | 28  | 43              | 32  | -2     | (4)   | 0.48 | 35              | 24  | 36              | 29  | 1      | (3)   | 0.35 |
| radical RT                        | 113             | 72  | 90              | 68  | -23    | (20)  |      | 112             | 76  | 89              | 71  | -23    | (21)  |      |
| total                             | 158             |     | 133             |     | -25    | (16)  |      | 147             |     | 125             |     | -22    | (15)  |      |
| Respiratory system                |                 |     |                 |     |        |       |      |                 |     |                 |     |        |       |      |
| palliative RT                     | 265             | 61  | 227             | 62  | -38    | (14)  | 0.71 | 220             | 58  | 180             | 59  | -40    | (18)  | 0.87 |
| radical RT                        | 169             | 39  | 137             | 38  | -32    | (19)  |      | 158             | 42  | 126             | 41  | -32    | (20)  |      |
| total                             | 434             |     | 364             |     | -70    | (16)  |      | 378             |     | 306             |     | -72    | (19)  |      |
| Breast                            |                 |     |                 |     |        |       |      |                 |     |                 |     |        |       |      |
| palliative RT                     | 111             | 29  | 81              | 23  | -30    | (27)  | 0.07 | 76              | 22  | 60              | 18  | -16    | (21)  | 0.22 |
| radical RT                        | 271             | 71  | 268             | 77  | -3     | (1)   |      | 267             | 78  | 267             | 82  | 0      | (0)   |      |
| total                             | 382             |     | 349             |     | -33    | (9)   |      | 343             |     | 327             |     | -16    | (5)   |      |
| Gynecological                     |                 |     |                 |     |        |       |      |                 |     |                 |     |        |       |      |
| palliative RT                     | 55              | 49  | 51              | 50  | -4     | (7)   | 0.85 | 49              | 46  | 46              | 47  | -3     | (6)   | 0.86 |
| radical RT                        | 58              | 51  | 51              | 50  | -7     | (12)  |      | 57              | 54  | 51              | 53  | -6     | (11)  |      |
| total                             | 113             |     | 102             |     | -11    | (10)  |      | 106             |     | 97              |     | -9     | (8)   |      |
| Prostate                          |                 |     |                 |     |        |       |      |                 |     |                 |     |        |       |      |
| palliative RT                     | 71              | 25  | 47              | 20  | -24    | (34)  | 0.19 | 58              | 22  | 32              | 15  | -26    | (45)  | 0.06 |
| radical RT                        | 210             | 75  | 184             | 80  | -26    | (12)  |      | 207             | 78  | 181             | 85  | -26    | (13)  |      |
| total                             | 281             |     | 231             |     | -50    | (18)  |      | 265             |     | 213             |     | -52    | (20)  |      |
| Urinary system (without prostate) |                 |     |                 |     |        |       |      |                 |     |                 |     |        |       |      |
| palliative RT                     | 58              | 89  | 57              | 89  | -1     | (2)   | 0.98 | 45              | 87  | 44              | 86  | -1     | (2)   | 0.97 |
| radical RT                        | 7               | 11  | 7               | 11  | 0      | (0)   |      | 7               | 13  | 7               | 14  | 0      | (0)   |      |
| total                             | 65              |     | 64              |     | -1     | (2)   |      | 52              |     | 51              |     | -1     | (2)   |      |
| CNS                               |                 |     |                 |     |        |       |      |                 |     |                 |     |        |       |      |
| palliative RT                     | 5               | 13  | 8               | 24  | 3      | (60)  | 0.21 | 5               | 13  | 7               | 21  | 2      | (40)  | 0.32 |
| radical RT                        | 35              | 88  | 26              | 76  | -9     | (26)  |      | 35              | 88  | 26              | 79  | -9     | (26)  |      |
| total                             | 40              |     | 34              |     | -6     | (15)  |      | 40              |     | 33              |     | -7     | (18)  |      |
| FPI                               |                 |     |                 |     |        |       |      |                 |     |                 |     |        |       |      |
| palliative RT                     | 19              | 79  | 16              | 100 | -3     | (16)  | 0.05 | 16              | 76  | 15              | 100 | -1     | (6)   | 0.04 |
| radical RT                        | 5               | 21  | 0               | 0   | -5     | (100) |      | 5               | 24  | 0               | 0   | -5     | (100) |      |
| total                             | 24              |     | 16              |     | -8     | (33)  |      | 21              |     | 15              |     | -6     | (29)  |      |

**Table S4.** The number of radiotherapy procedures and patients treated with radiation therapy in Elblag due to different cancer localization.

|                                   | RT procedures   |     |                 |     |        |       |       | Patients        |     |                 |     |        |       |       |
|-----------------------------------|-----------------|-----|-----------------|-----|--------|-------|-------|-----------------|-----|-----------------|-----|--------|-------|-------|
|                                   | Before pandemic |     | During pandemic |     | change | (%)   | p     | Before pandemic |     | During pandemic |     | change | (%)   | p     |
|                                   | n               | (%) | n               | (%) |        |       |       | n               | (%) | n               | (%) |        |       |       |
| Head and neck                     |                 |     |                 |     |        |       |       |                 |     |                 |     |        |       |       |
| palliative RT                     | 54              | 53  | 31              | 36  | -23    | (43)  | 0.02  | 54              | 56  | 30              | 36  | -24    | (44)  | 0.007 |
| radical RT                        | 48              | 47  | 54              | 64  | 6      | (13)  |       | 43              | 44  | 54              | 64  | 11     | (26)  |       |
| total                             | 102             |     | 85              |     | -17    | (17)  |       | 97              |     | 84              |     | -13    | (13)  |       |
| Upper digestive system            |                 |     |                 |     |        |       |       |                 |     |                 |     |        |       |       |
| palliative RT                     | 6               | 22  | 22              | 40  | 16     | (267) | 0.11  | 6               | 24  | 19              | 40  | 13     | (217) | 0.16  |
| radical RT                        | 21              | 78  | 33              | 60  | 12     | (57)  |       | 19              | 76  | 28              | 60  | 9      | (47)  |       |
| total                             | 27              |     | 55              |     | 28     | (104) |       | 25              |     | 47              |     | 22     | (88)  |       |
| Lower digestive system            |                 |     |                 |     |        |       |       |                 |     |                 |     |        |       |       |
| palliative RT                     | 46              | 55  | 28              | 37  | -18    | (39)  | 0.02  | 42              | 59  | 24              | 36  | -18    | (43)  | 0.008 |
| radical RT                        | 37              | 45  | 47              | 63  | 10     | (27)  |       | 29              | 41  | 42              | 64  | 13     | (45)  |       |
| total                             | 83              |     | 75              |     | -8     | (10)  |       | 71              |     | 66              |     | -5     | (7)   |       |
| Respiratory system                |                 |     |                 |     |        |       |       |                 |     |                 |     |        |       |       |
| palliative RT                     | 173             | 42  | 168             | 45  | -5     | (3)   | 0.42  | 148             | 50  | 144             | 51  | -4     | (3)   | 0.80  |
| radical RT                        | 237             | 58  | 205             | 55  | -32    | (14)  |       | 148             | 50  | 138             | 49  | -10    | (7)   |       |
| total                             | 410             |     | 373             |     | -37    | (9)   |       | 296             |     | 282             |     | -14    | (5)   |       |
| Breast                            |                 |     |                 |     |        |       |       |                 |     |                 |     |        |       |       |
| palliative RT                     | 112             | 42  | 83              | 36  | -29    | (26)  | 0.18  | 99              | 43  | 73              | 37  | -26    | (26)  | 0.20  |
| radical RT                        | 157             | 58  | 149             | 64  | -8     | (5)   |       | 130             | 57  | 124             | 63  | -6     | (5)   |       |
| total                             | 269             |     | 232             |     | -37    | (14)  |       | 229             |     | 197             |     | -32    | (14)  |       |
| Gynecological                     |                 |     |                 |     |        |       |       |                 |     |                 |     |        |       |       |
| palliative RT                     | 29              | 42  | 30              | 52  | 1      | (3)   | 0.28  | 27              | 42  | 29              | 52  | 2      | (7)   | 0.26  |
| radical RT                        | 40              | 58  | 28              | 48  | -12    | (30)  |       | 38              | 58  | 27              | 48  | -11    | (29)  |       |
| total                             | 69              |     | 58              |     | -11    | (16)  |       | 65              |     | 56              |     | -9     | (14)  |       |
| Prostate                          |                 |     |                 |     |        |       |       |                 |     |                 |     |        |       |       |
| palliative RT                     | 86              | 40  | 101             | 43  | 15     | (17)  | 0.55  | 82              | 42  | 84              | 41  | 2      | (2)   | 0.89  |
| radical RT                        | 130             | 60  | 136             | 57  | 6      | (5)   |       | 113             | 58  | 119             | 59  | 6      | (5)   |       |
| total                             | 216             |     | 237             |     | 21     | (10)  |       | 195             |     | 203             |     | 8      | (4)   |       |
| Urinary system (without prostate) |                 |     |                 |     |        |       |       |                 |     |                 |     |        |       |       |
| palliative RT                     | 31              | 54  | 46              | 59  | 15     | (48)  | 0.59  | 25              | 58  | 30              | 68  | 5      | (20)  | 0.33  |
| radical RT                        | 26              | 46  | 32              | 41  | 6      | (23)  |       | 18              | 42  | 14              | 32  | -4     | (22)  |       |
| total                             | 57              |     | 78              |     | 21     | (37)  |       | 43              |     | 44              |     | 1      | (2)   |       |
| CNS                               |                 |     |                 |     |        |       |       |                 |     |                 |     |        |       |       |
| palliative RT                     | 13              | 48  | 12              | 38  | -1     | (8)   | 0.41  | 13              | 48  | 12              | 38  | -1     | (8)   | 0.41  |
| radical RT                        | 14              | 52  | 20              | 63  | 6      | (43)  |       | 14              | 52  | 20              | 63  | 6      | (43)  |       |
| total                             | 27              |     | 32              |     | 5      | (19)  |       | 27              |     | 32              |     | 5      | (19)  |       |
| FPI                               |                 |     |                 |     |        |       |       |                 |     |                 |     |        |       |       |
| palliative RT                     | 21              | 78  | 7               | 37  | -14    | (67)  | 0.005 | 15              | 88  | 6               | 43  | -9     | (60)  | 0.007 |
| radical RT                        | 6               | 22  | 12              | 63  | 6      | (100) |       | 2               | 12  | 8               | 57  | 6      | (300) |       |
| total                             | 27              |     | 19              |     | -8     | (30)  |       | 17              |     | 14              |     | -3     | (18)  |       |

**Figure S1.** Distribution of RT procedures due to cancer localization. (A) Head and neck (ICD-10: C00-C14; C30-C32), (B) Upper digestive system (ICD-10: C15; C16; C22; C24; C25; C26; D37), (C) Lower digestive system (ICD-10: C17-C21), (D) Respiratory system (ICD-10: C33-C35; C38; C45; D38), (E) Breast (ICD-10: C50), (F) Gynecological (ICD-10: C51-C54; C56-C57), (G) Prostate (ICD-10: C61), (H) Urinary system (without prostate) (ICD-10: C64; C65-C67), (I) CNS (ICD-10: C70-C72; D43), (J) FPI (ICD-10: C80).

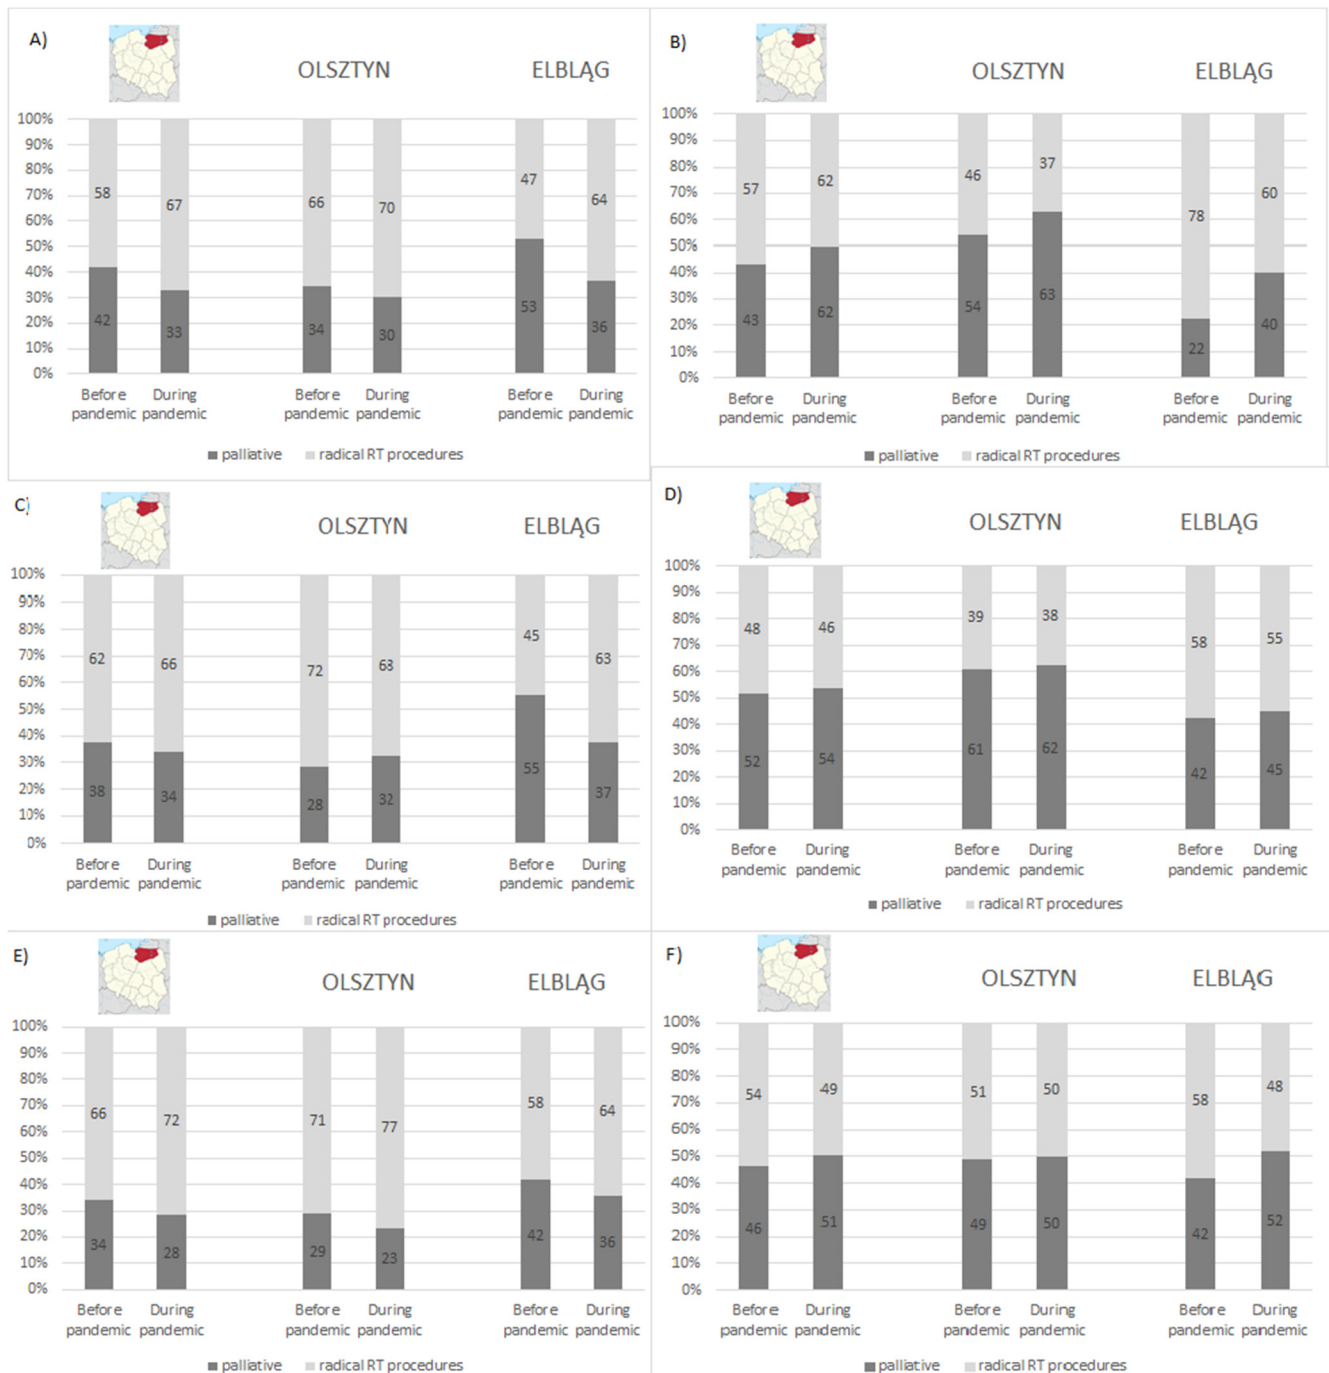

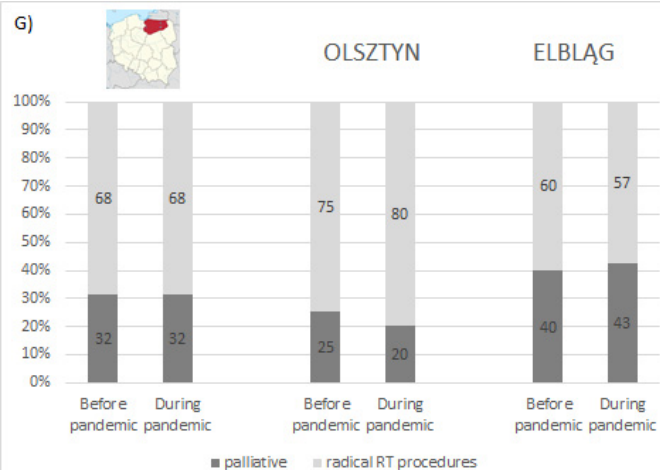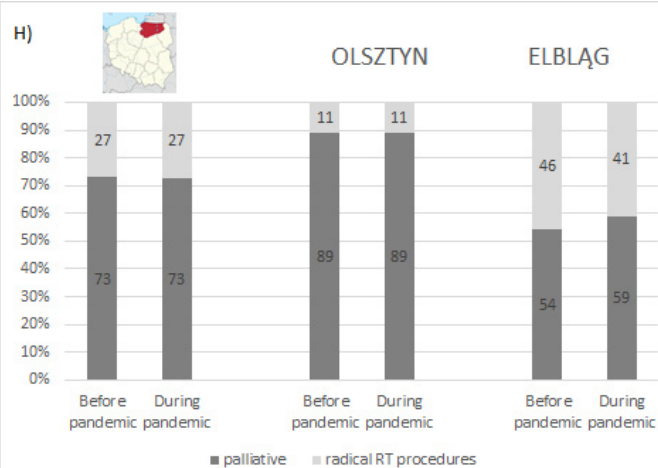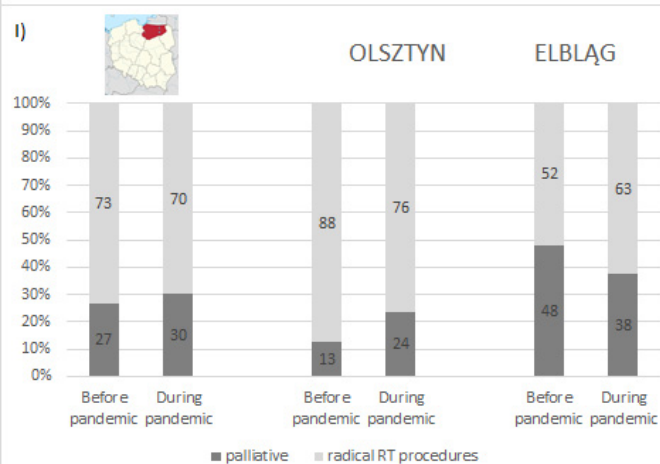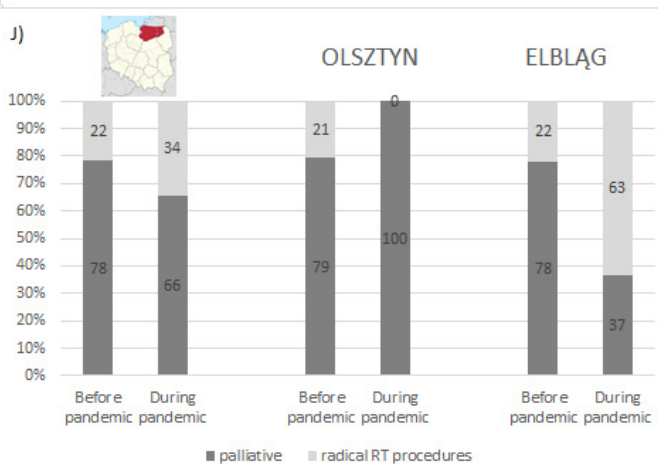

**Figure S2.** Distribution of patients treated with RT due to cancer localization. (A) Head and neck (ICD-10: C00-C14; C30-C32), (B) Upper digestive system (ICD-10: C15; C16; C22; C24; C25; C26; D37), (C) Lower digestive system (ICD-10: C17-C21), (D) Respiratory system (ICD-10: C33-C35; C38; C45; D38), (E) Breast (ICD-10: C50), (F) Gynecological (ICD-10: C51-C54; C56-C57), (G) Prostate (ICD-10: C61), (H) Urinary system (without prostate) (ICD-10: C64; C65-C67), (I) CNS (ICD-10: C70-C72; D43), (J) FPI (ICD-10: C80).

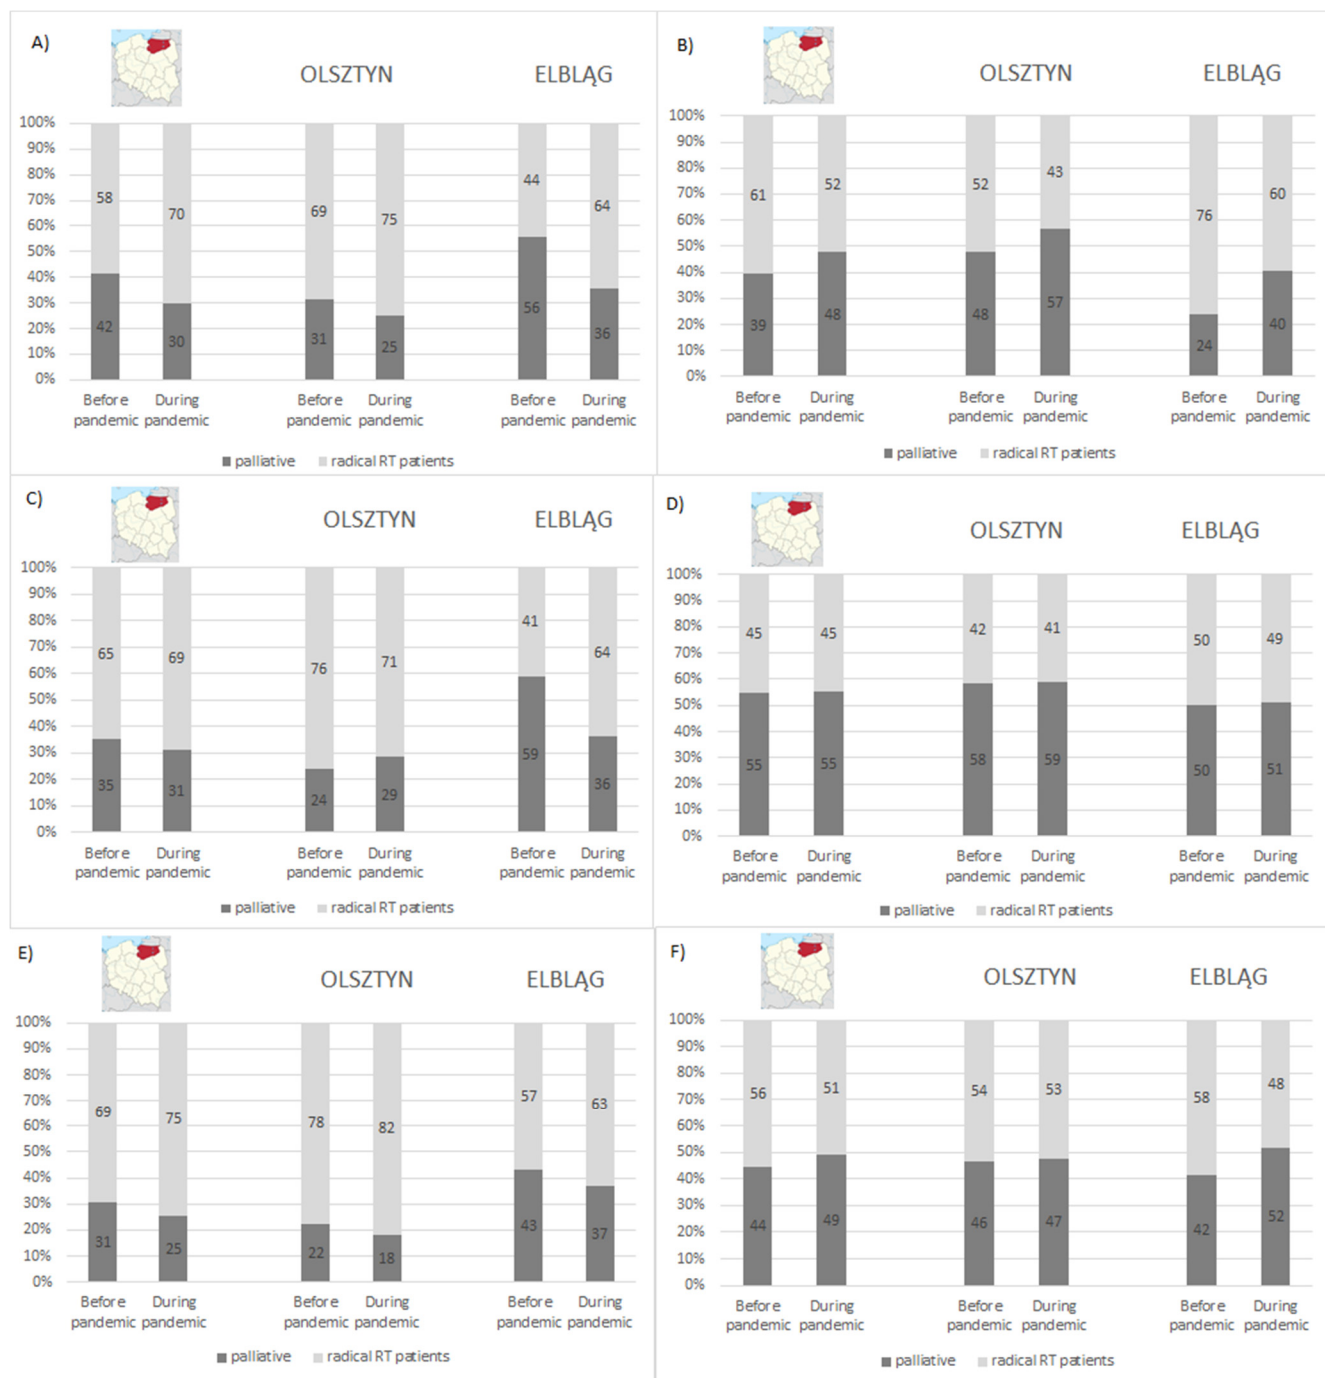

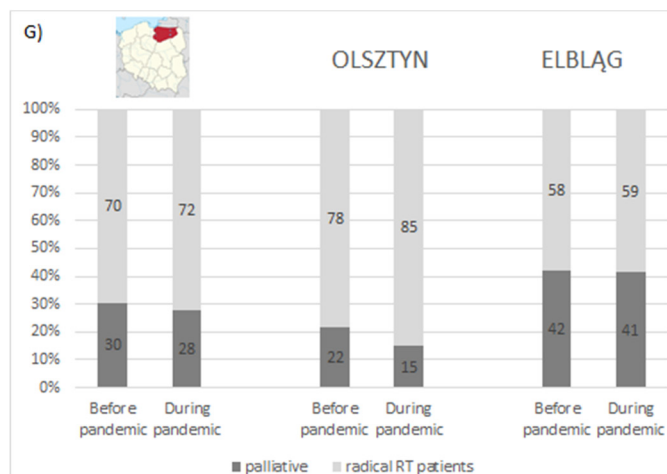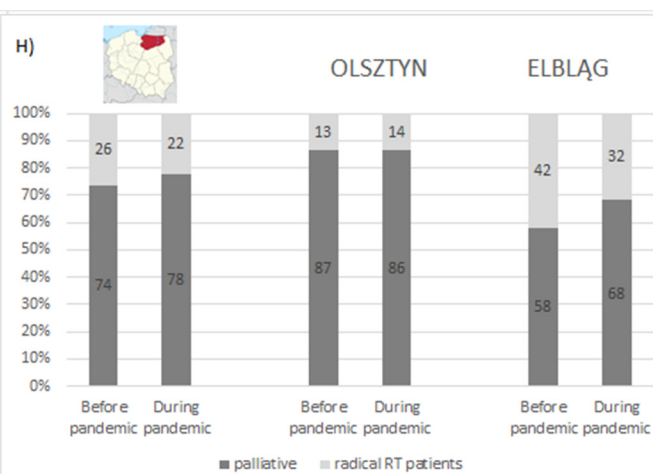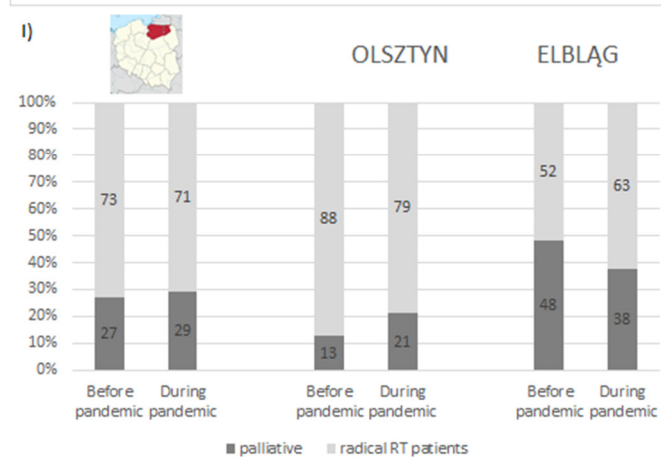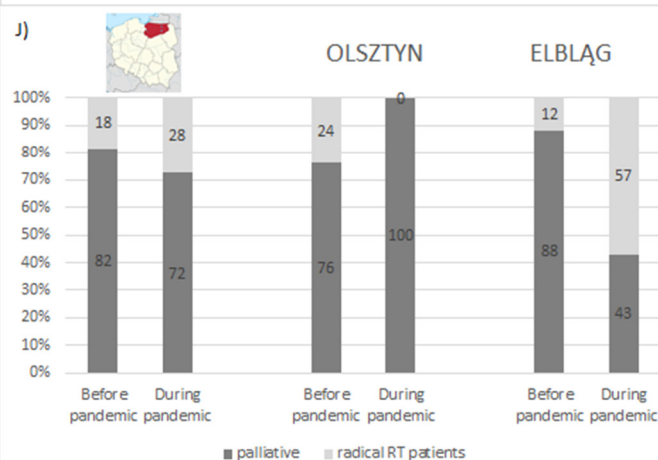

Supplement: s1 [file s1]
